# Supplementary material for: Identification of the sex-determining locus in grass puffer (Takifugu niphobles) provides evidence for sex-chromosome turnover in a subset of Takifugu species
Source: PLoS One. 2018 Jan 2;13(1):e0190635. doi: 10.1371/journal.pone.0190635 (PMC5749833; doi:10.1371/journal.pone.0190635)
Supplement: S1 Table — (XLSX) [file pone.0190635.s006.xlsx]

## Sheet: S1_Table
S1 Table. Primer sequences for DNA sequencing.
Primer Name	Sequence
13	GGAGATGGTGCACAGGAAAT
16r	GCGCTTCTGTTGCTTTCAAT
17r	TAGGGAGCACCTGACTGACC
18r	GCTGCAGCTCAACGTCTGTA
19r	AGAGCGGTTGTCATGGTTTC
21r	TTTGTTAAAGAGTCCTTCAGTCAGA
amhII-1530R	GAATGGTGGCTTCAAAATGC
amhrII-1-1436R	CCATGATTCCGAGAGACTGG
amhrII-1-1972R	AAACGCCAAGGTCAGTTCAG
amhrII-1530F	TGTGGTTCTGGCATGATGTT
amhrII-2-27F	CACATTTCTCTTCGCTCCTCA
amhrII-2-629R	CGAGACATCACCATGACACA
amhrII-2360R	TTTTGGTGTGTTGTGGTGCT
amhrII-3-1645R	GCTAAGCAGTTGCCACACAA
amhrII-3270F	TGCGTGAAAACTCCATTGAC
amhrII-3270R	TCGCTCTGTCTGTGACATCC
amhrII-4230F	TCCCCCAGTGTTTGTTTTTC
ex2F	CTGTGCGTACCATGTGACTG
ex2R	CAGTCACATGGTACGCACAG
ex4F	GAAACCATGACAACCGCTCTC
ex4R	GAGAGCGGTTGTCATGGTTTC
